# Supplementary material
Source: publisher figshare collection journal article supplement (https://springernature.figshare.com/ndownloader/files/14938934)

**Figure S1.** Effect of incubation time on concentration of intracellular (left) and extracellular (right) glycine and alanine by enriched methanogenic cultures in anaerobic batch digestion (AUMC: Acetate-utilizing methanogenic culture; GEMC: Gelatin enriched mixed culture; GEMC-CA: Gelatin enriched mixed culture with Clostridium acetobutylicum NCIM 2841)


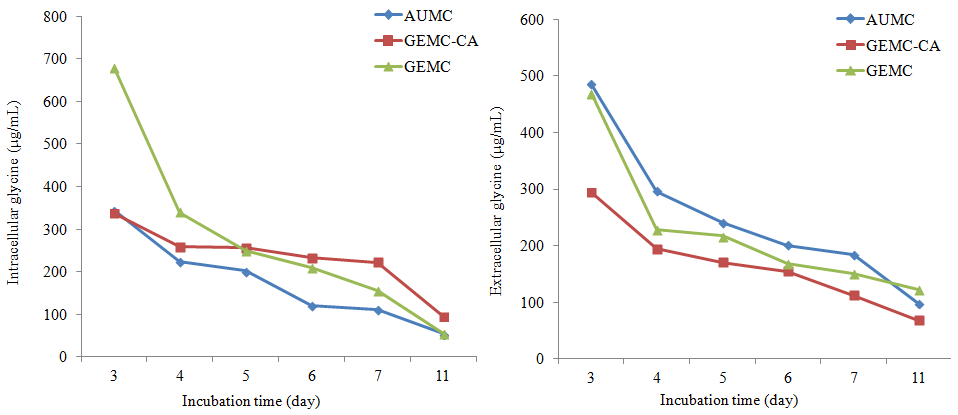


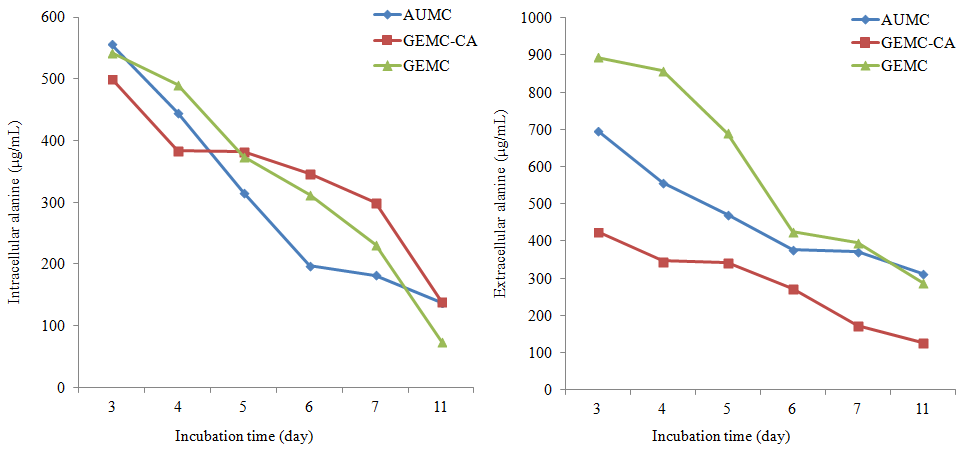

Supplement: Supplementary file 1 [file 14938934]
